# Supplementary material for: A pre-formulation strategy for the liposome encapsulation of new thioctic acid conjugates for enhanced chemical stability and use as an efficient drug carrier for MPO-mediated atherosclerotic CVD treatment
Source: Royal Society of Chemistry journal article supplement (doi:10.1039/c9nj05258e), 2020-01-01
Supplement: c9nj05258e1.pdf [file c9nj05258e1.pdf]

## Pre-formulation strategy for liposome encapsulation of new thioctic acid conjugates for enhanced chemical stability and efficient drug carrier for MPO-Mediated atherosclerotic CVD treatment

Premkumar Jayaraj <sup>a</sup>, Gopal Venkatesh Shavi <sup>b</sup>, Anandakumar Srinivasan <sup>c</sup>, Ramesh Raghavendra <sup>b</sup>, Akella Sivaramakrishna <sup>a</sup>, Desikan Rajagopal <sup>\*a,d</sup>

Figure S1a. Proton NMR spectrum for Conjugate 1.

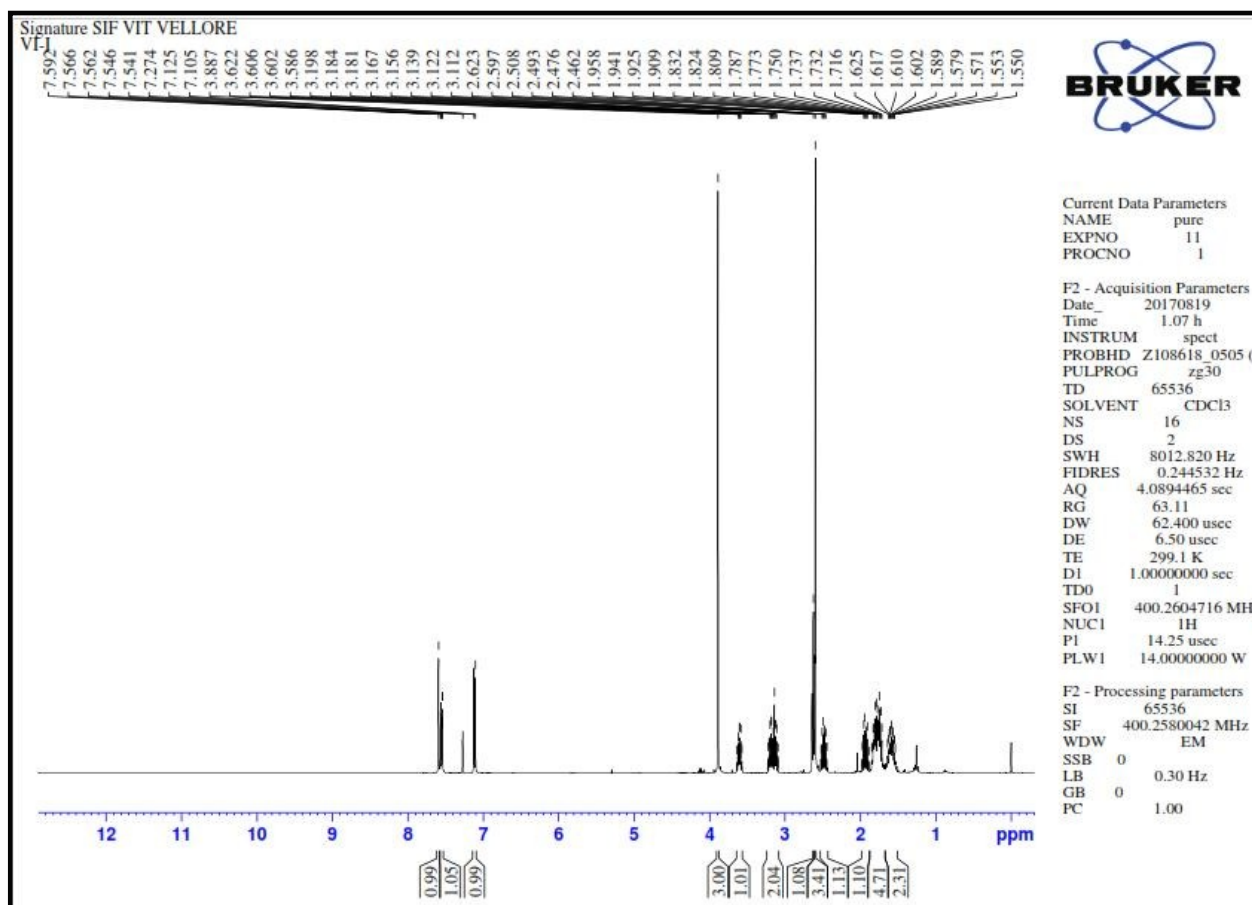

**Figure S1b.** Carbon NMR spectrum for Conjugate 1.

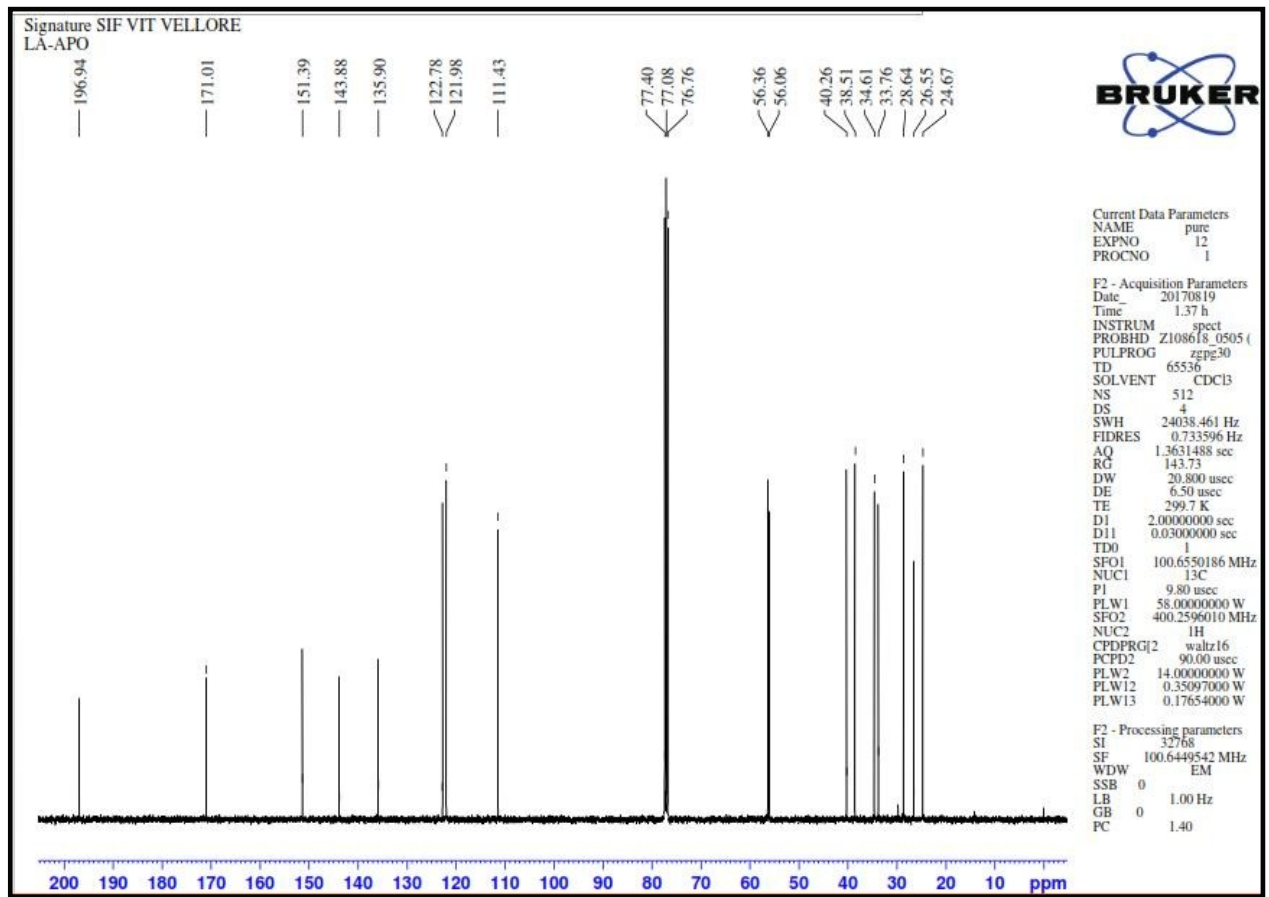

**Figure S1c.** LC-ESI-Mass spectrum for Conjugate 1.

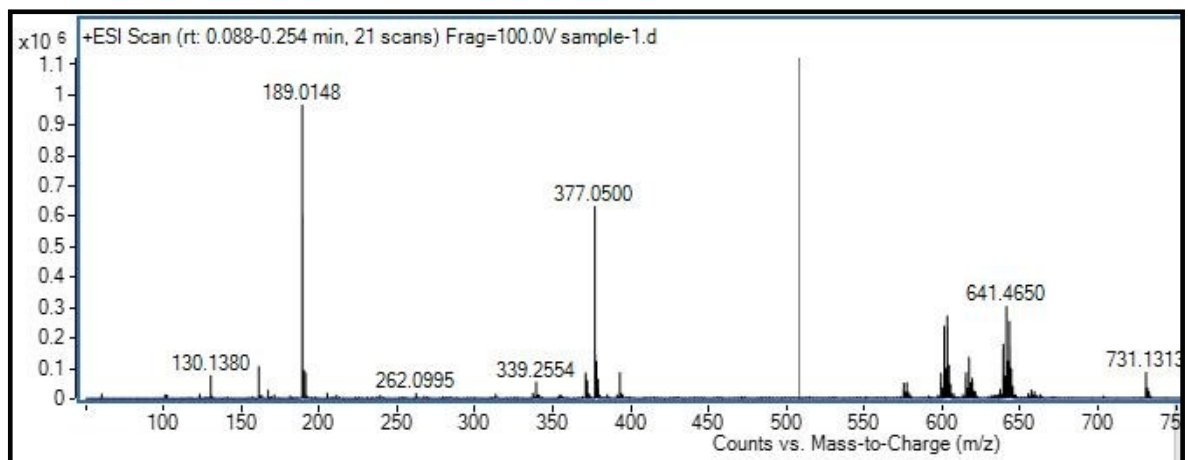

**Figure S2a.** Proton NMR spectrum for Conjugate 2.

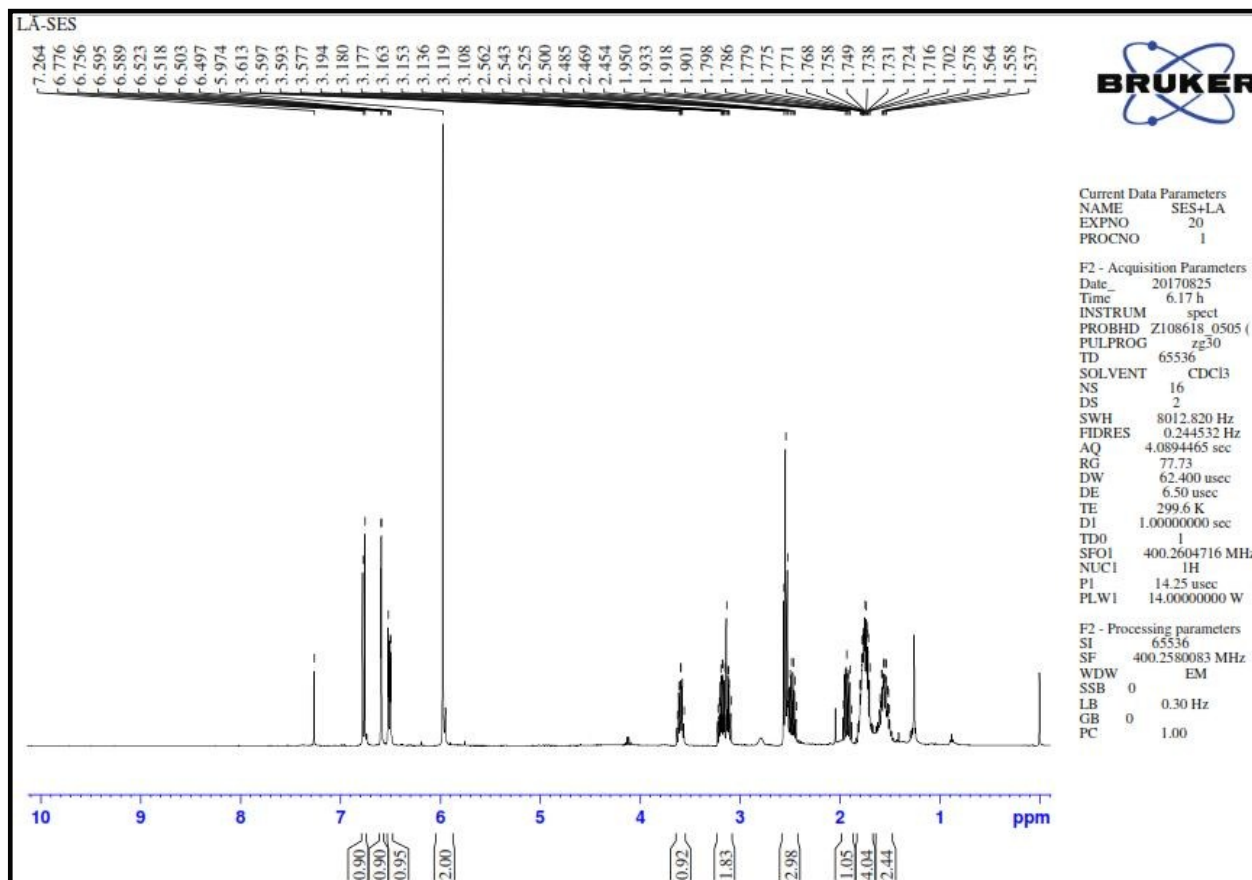

**Figure S2b.** Carbon NMR spectrum for Conjugate 2.

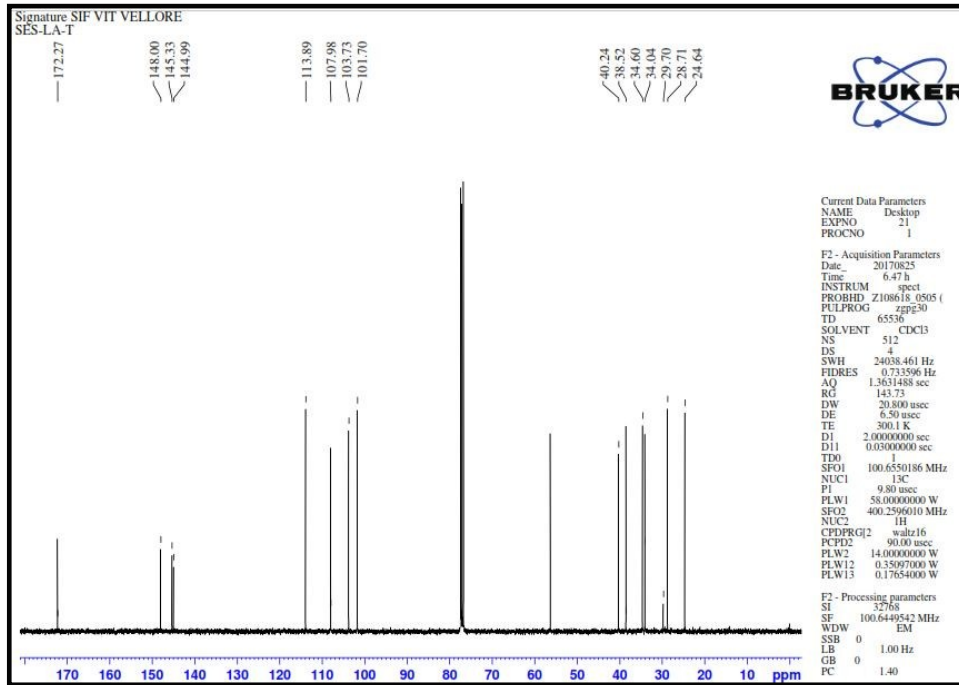

**Figure S2c.** LC-ESI-Mass spectrum for Conjugate 2.

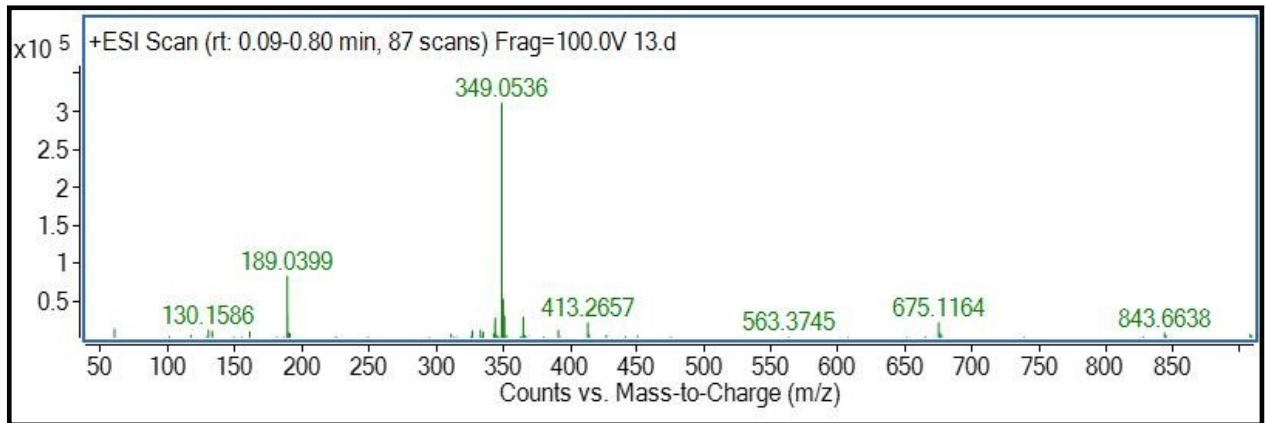

**Table S1.** Chemical stability of Conjugates **1** and **2** (plain conjugates as well as liposome loaded) in simulated body fluid at 48 h and 72 h. Appearance of intact conjugate, hydrolyzed conjugate of alcohol and acid (+ indicates presence and – indicates absence).

| <b>Conjugate</b>                    | <b>Intact Product</b> | <b>Presence of alcohol</b> | <b>Presence of acid</b> |
|-------------------------------------|-----------------------|----------------------------|-------------------------|
| Conjugate 1-Plain                   | +                     | +                          | +                       |
| Conjugate 1-liposome Loaded at 48 h | +                     | –                          | –                       |
| Conjugate 1-liposome Loaded at 72 h | +                     | –                          | –                       |
| Conjugate 2 -Plain                  | +                     | +                          | +                       |
| Conjugate 2-liposome Loaded at 48 h | +                     | –                          | –                       |
| Conjugate 2-liposome Loaded at 72 h | +                     | –                          | –                       |
